# Supplementary material
Source: PubMed Central journal article supplement (PMC7646677)

# Supplementary Fig 1 : CRISPR screen cells survival, sgRNA read and gene ontology of enriched themes

A

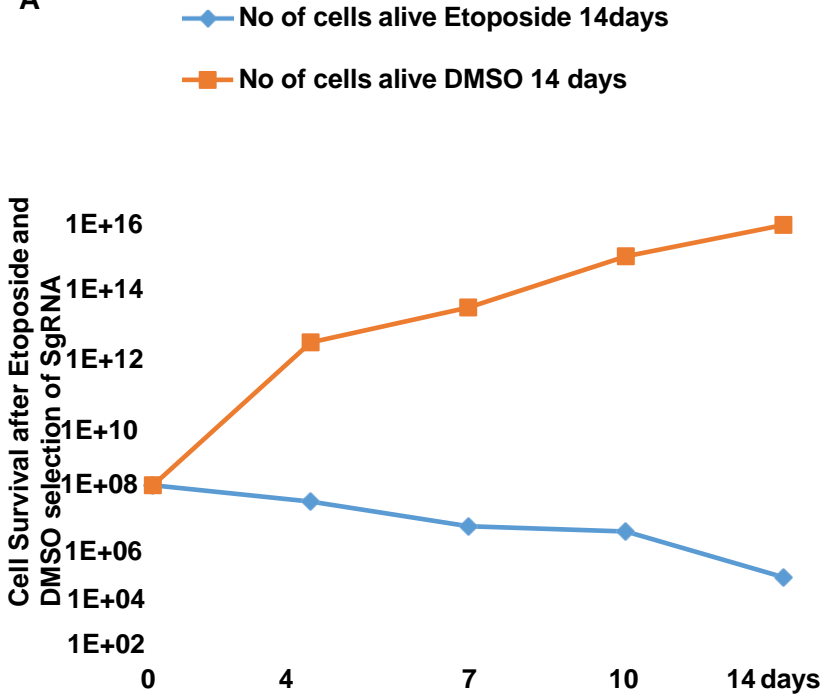

B

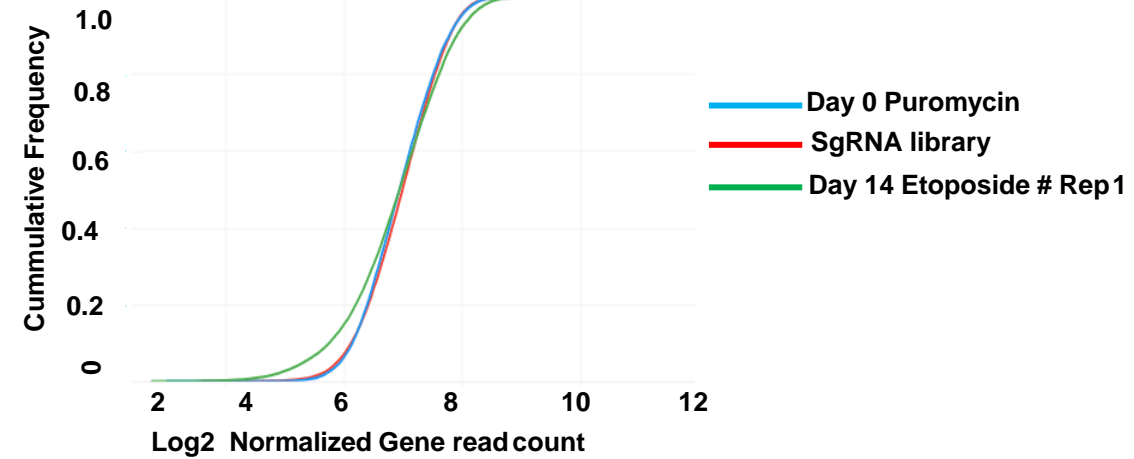

C

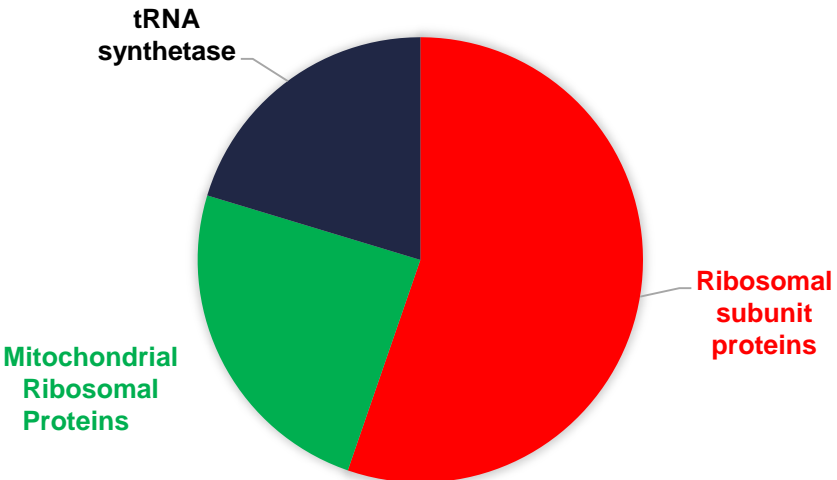

D

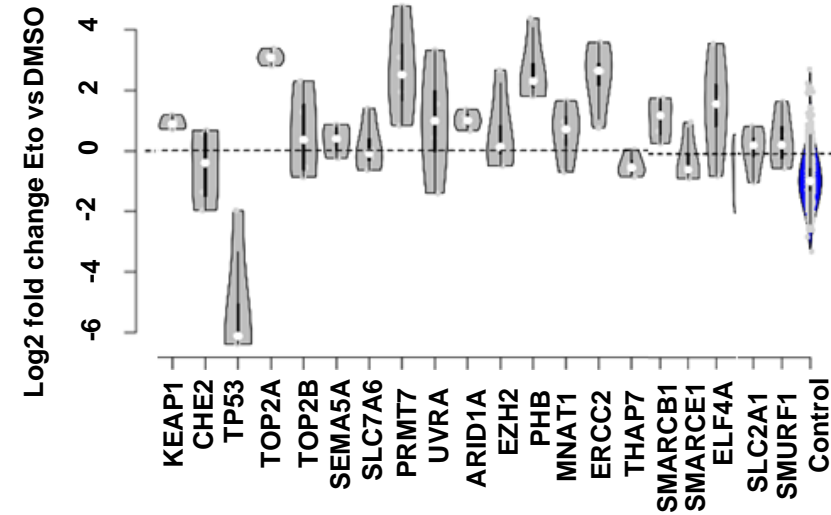

Supplementary Fig2 :Loss of FANCB confers glioblastoma resistance to etoposide, doxorubicin & DNA damage lesion, repair process in glioma.

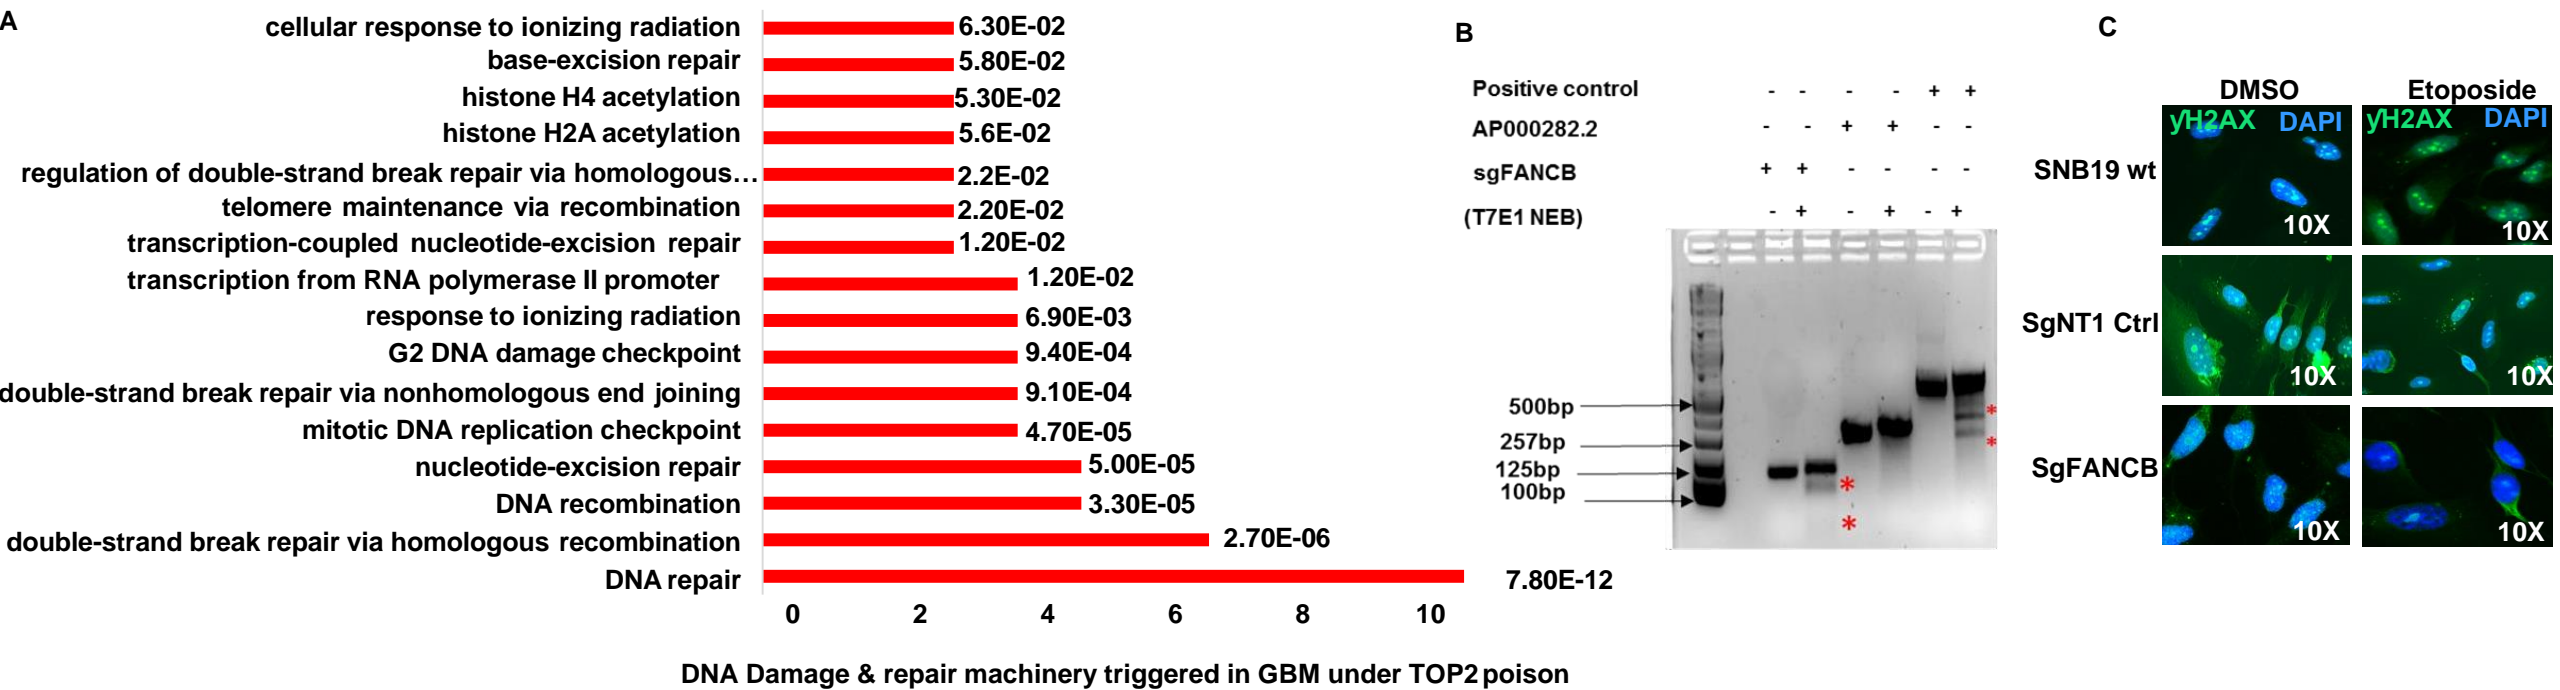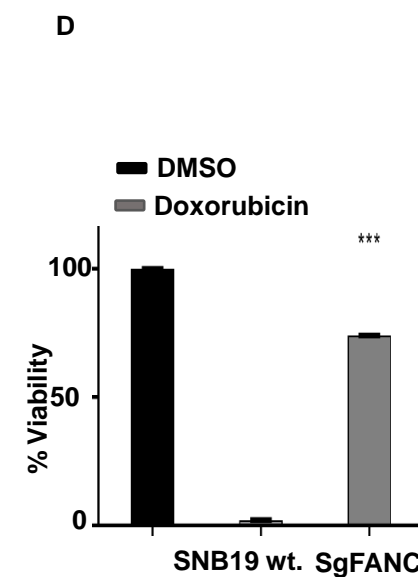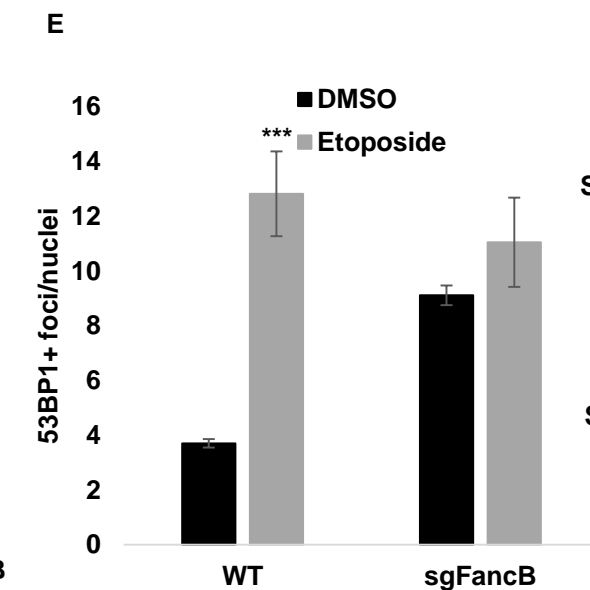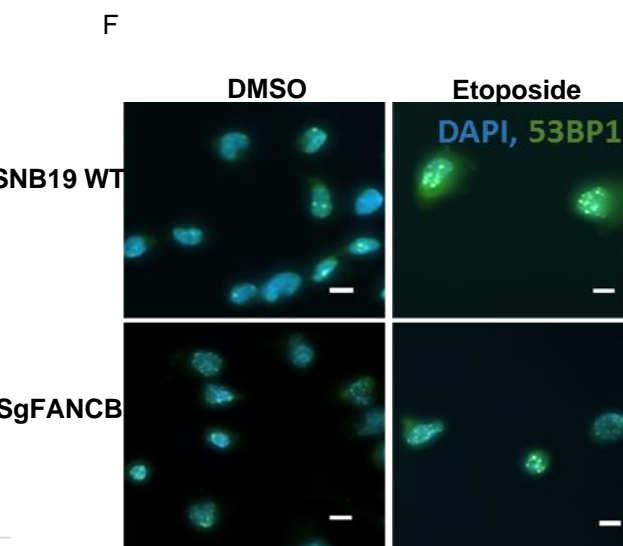

**Supplementary Fig 3: Expression of Ribosomal subunit proteins correlates with AUC & IC50 etoposide for glioma and many cancers, sgRPS11 edits efficiently.**

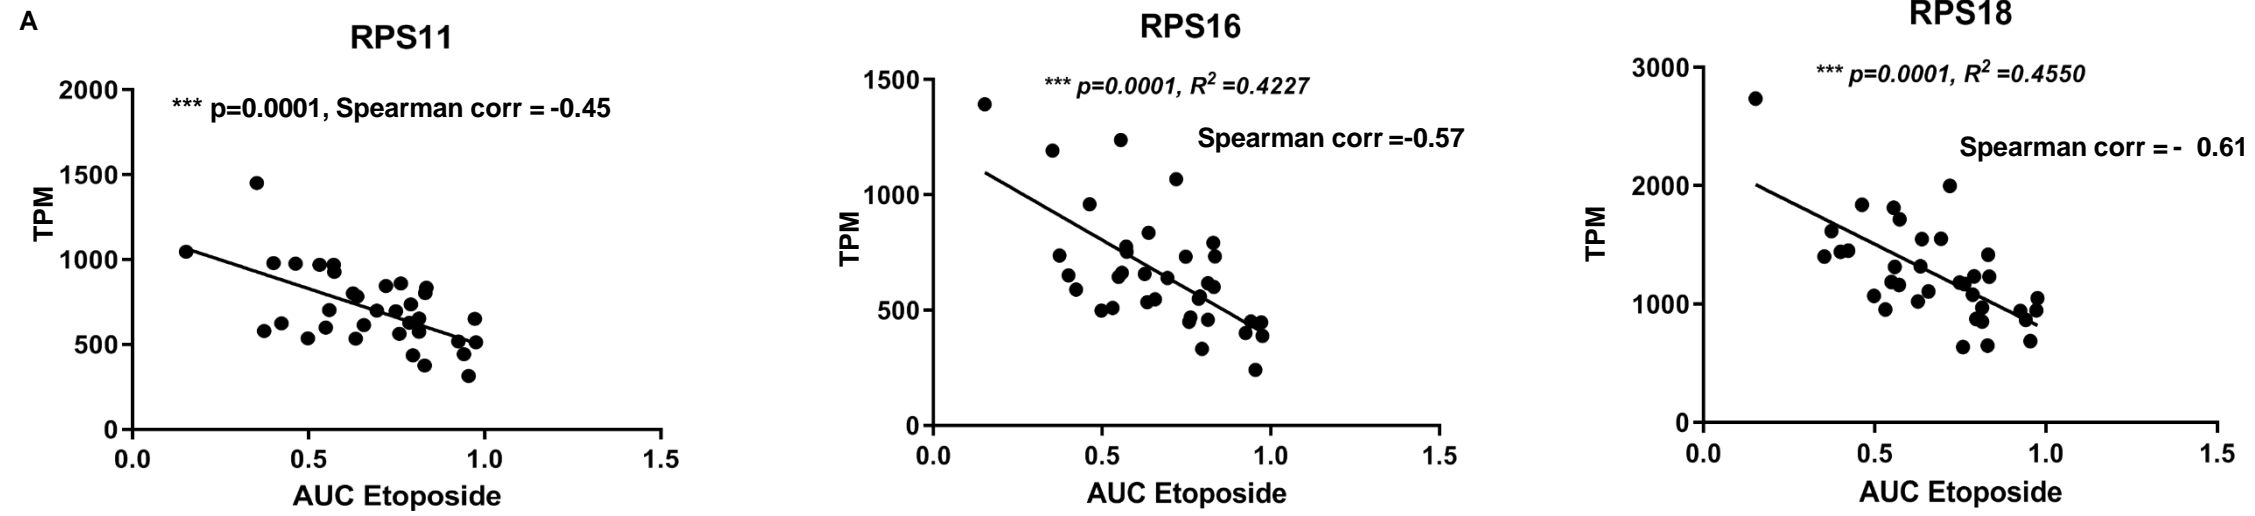

**B**

|                |   |   |   |   |   |   |
|----------------|---|---|---|---|---|---|
| RPS11 primer c | - | - | - | - | + | + |
| RPS11 primer b | - | - | + | + | - | - |
| RPS11 primer a | + | + | - | - | - | - |
| (T7E1 NEB)     | - | + | - | + | - | + |

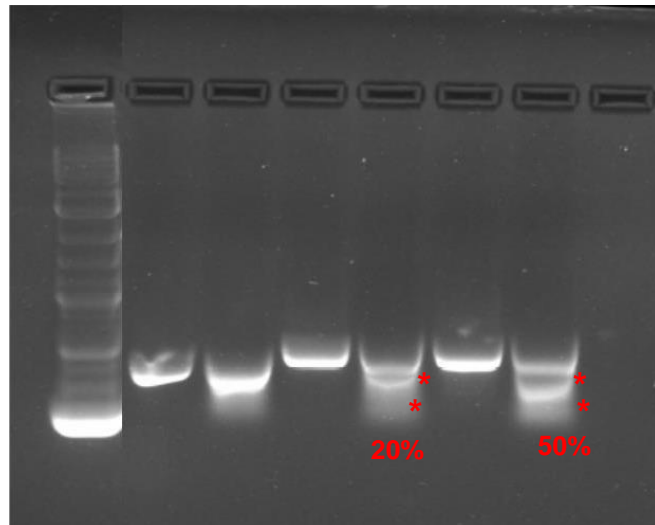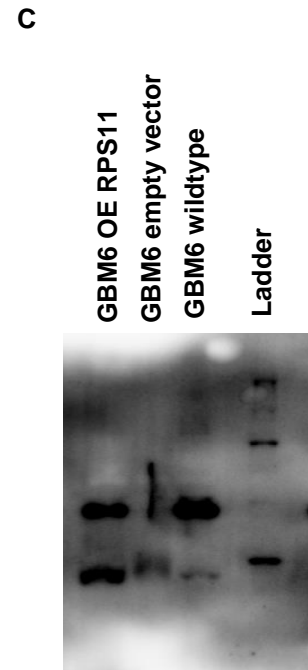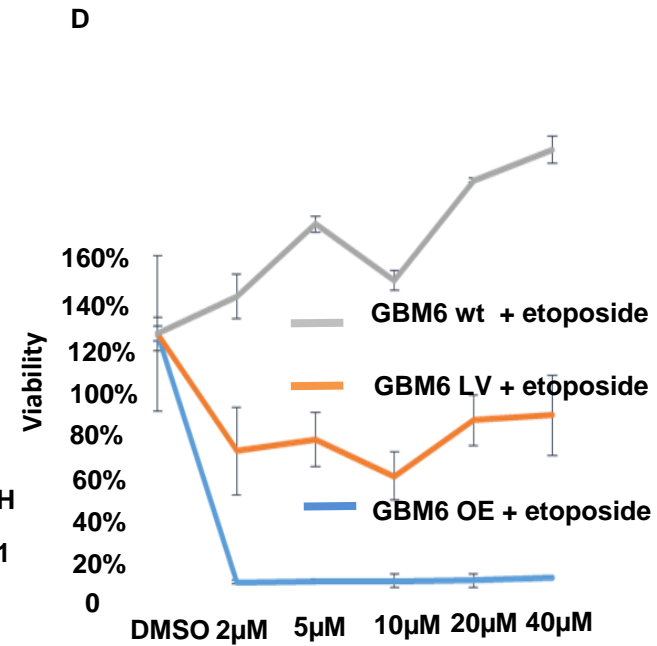

**Supplementary Fig 4: Nascent protein synthesis and apoptotic machinery expression in glioma under TOP2 poison treatment**

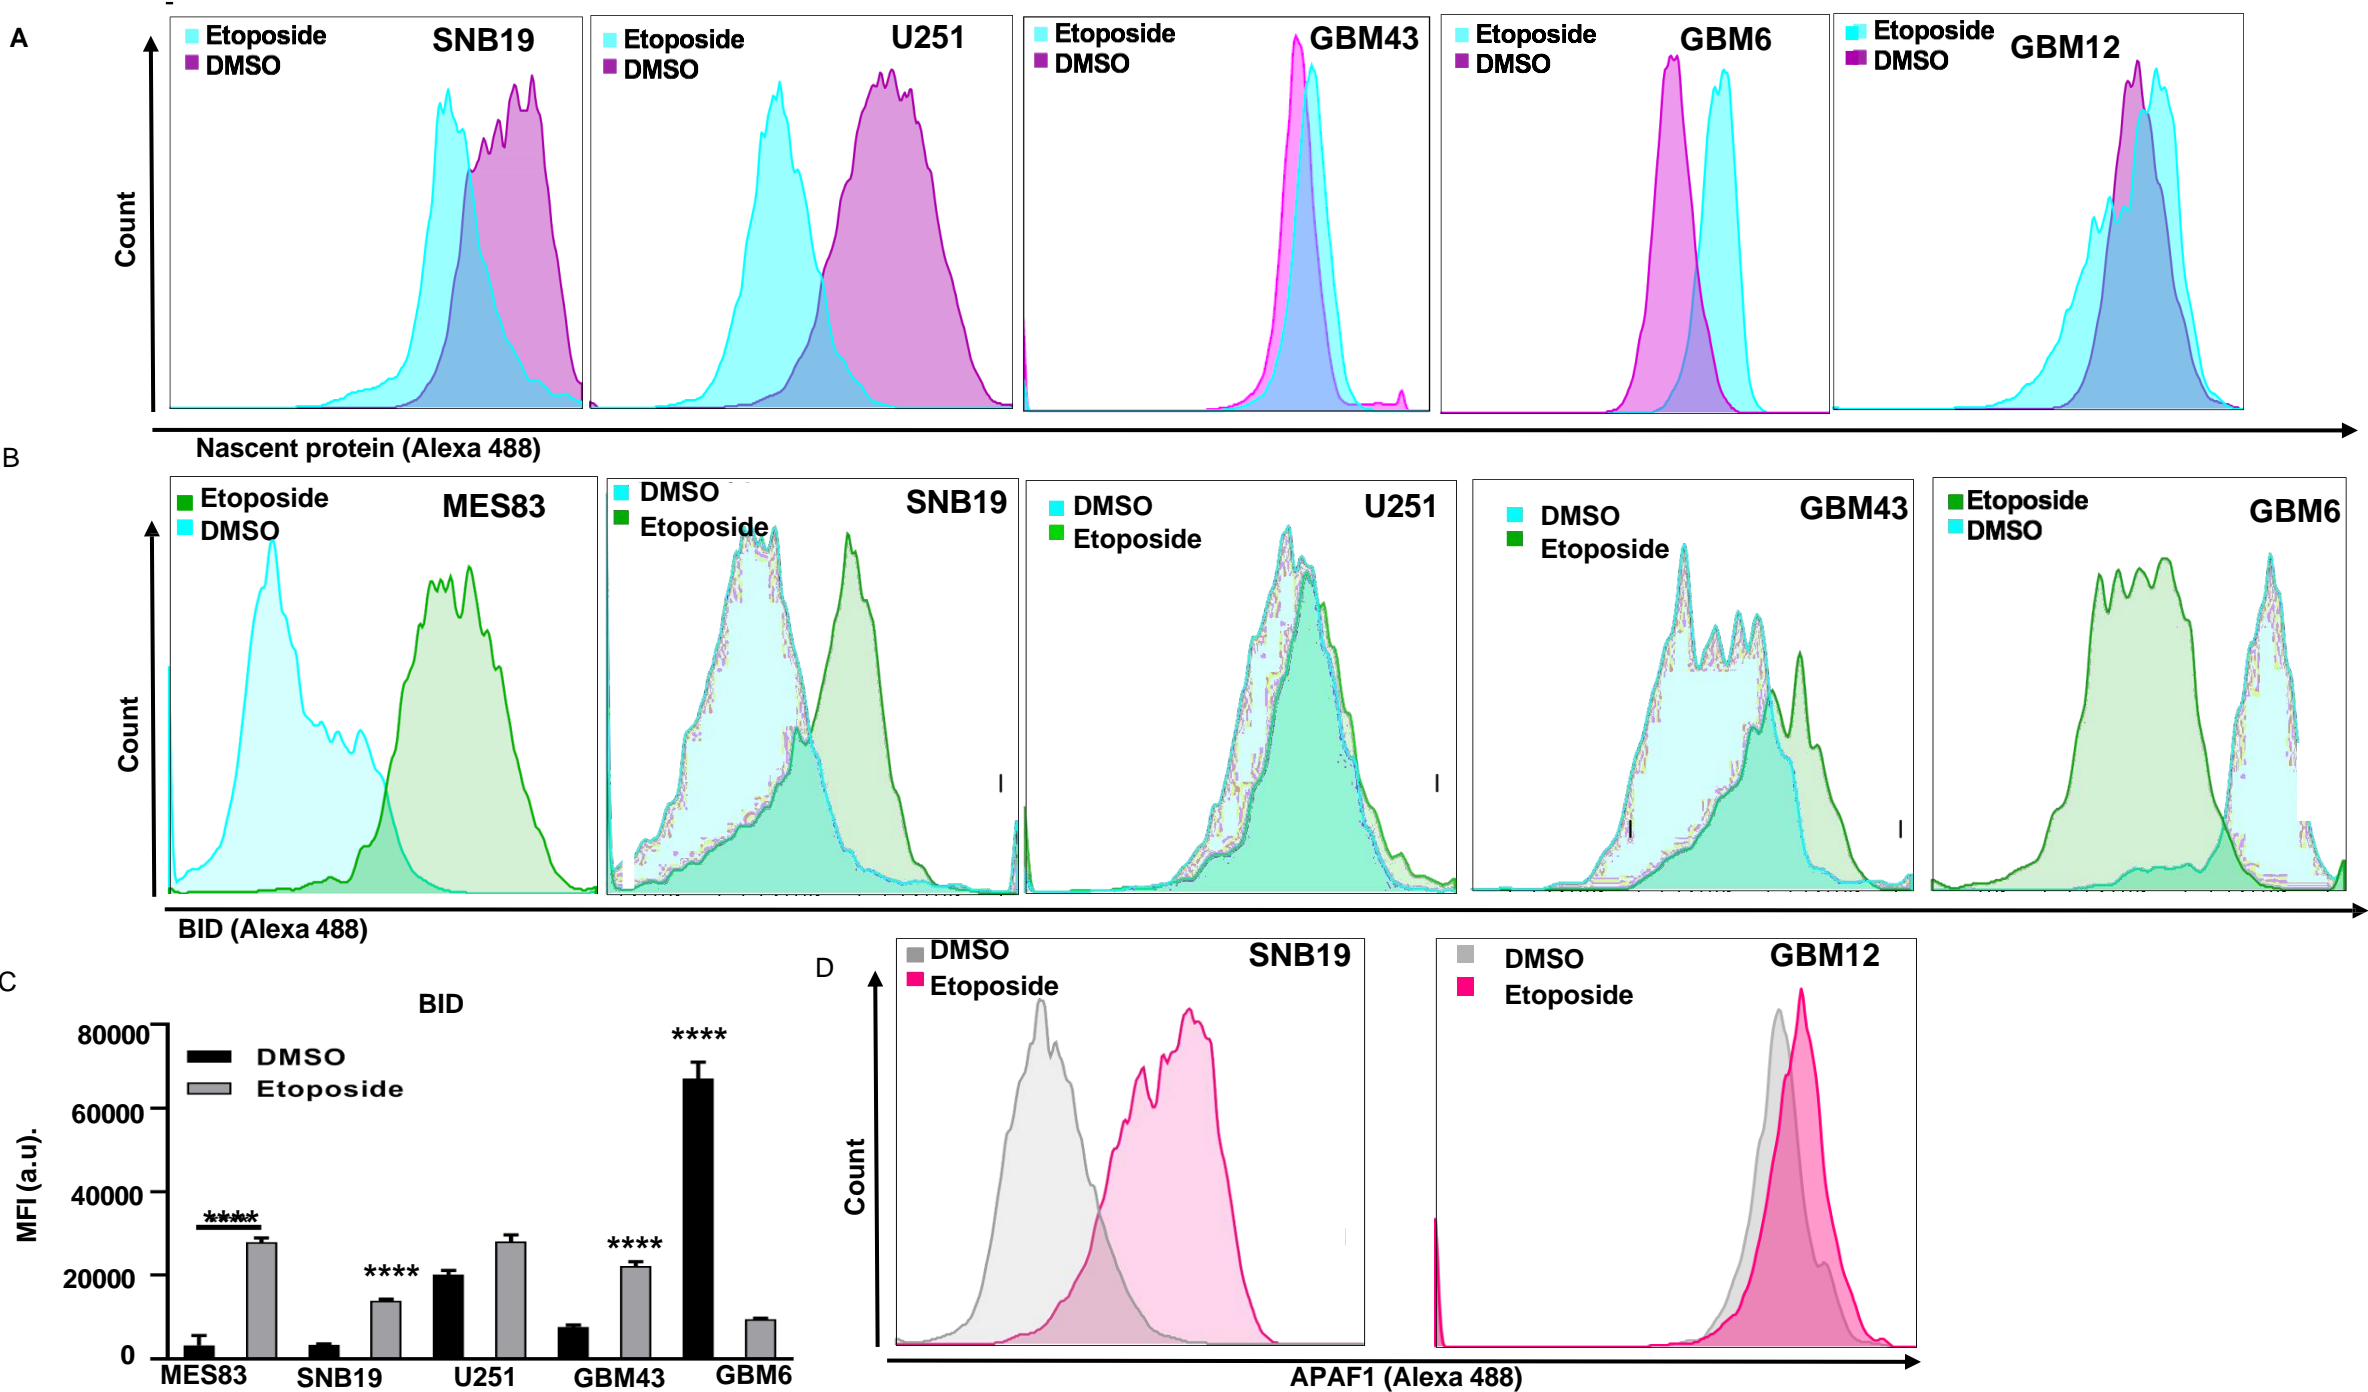

Supplementary Fig 5: BCL2 shows differential expression in GBM susceptibility to TOP2 poisons committed to apoptosis

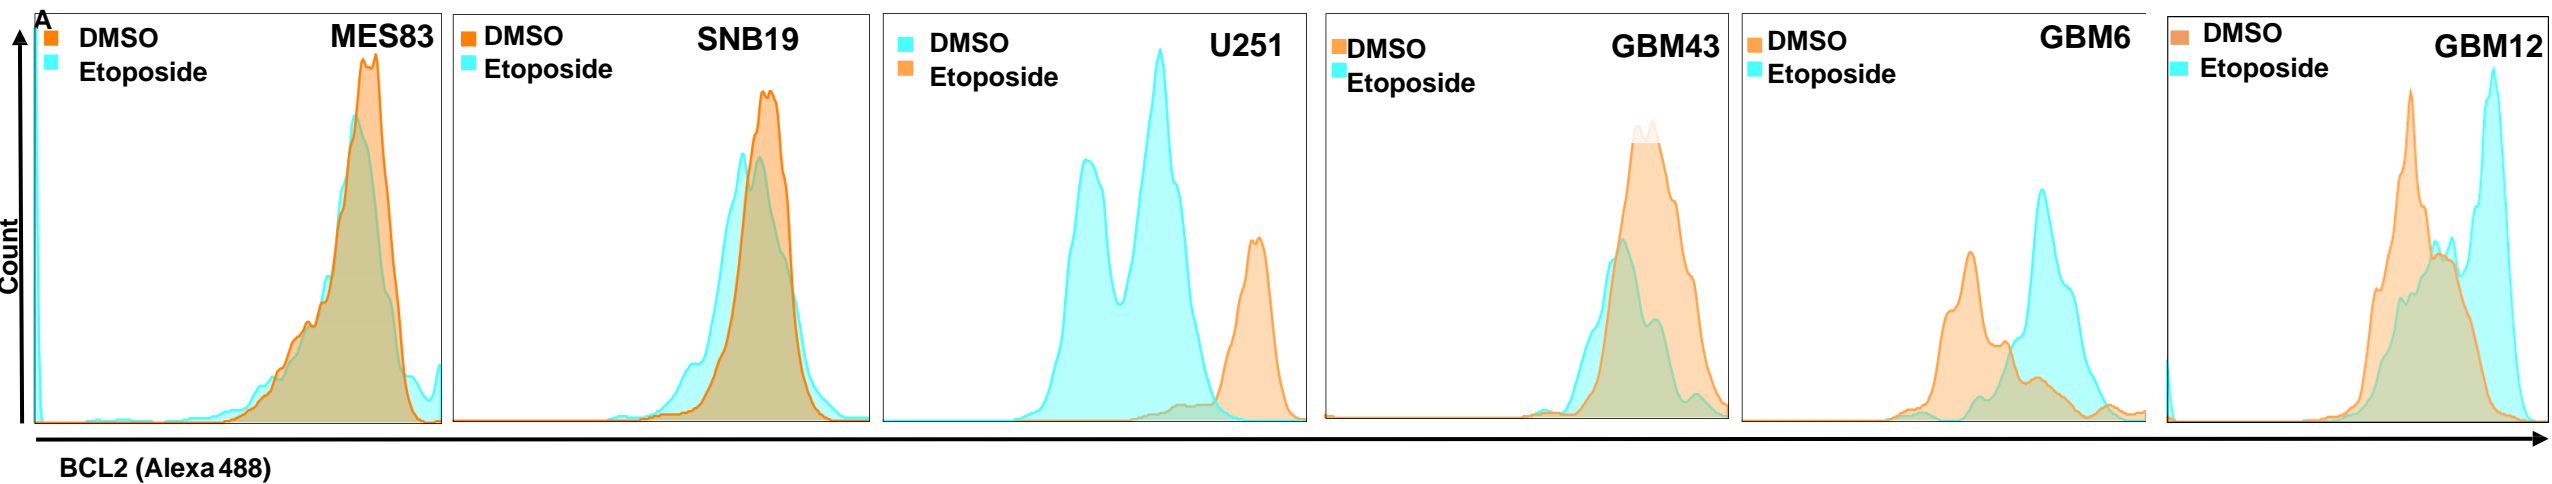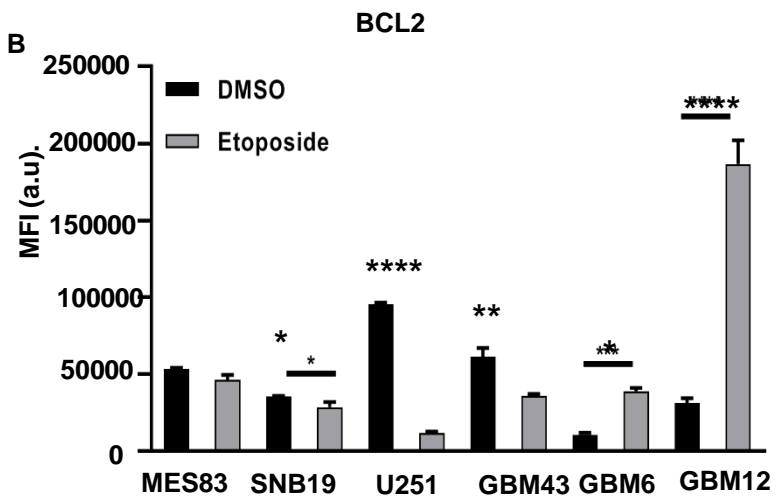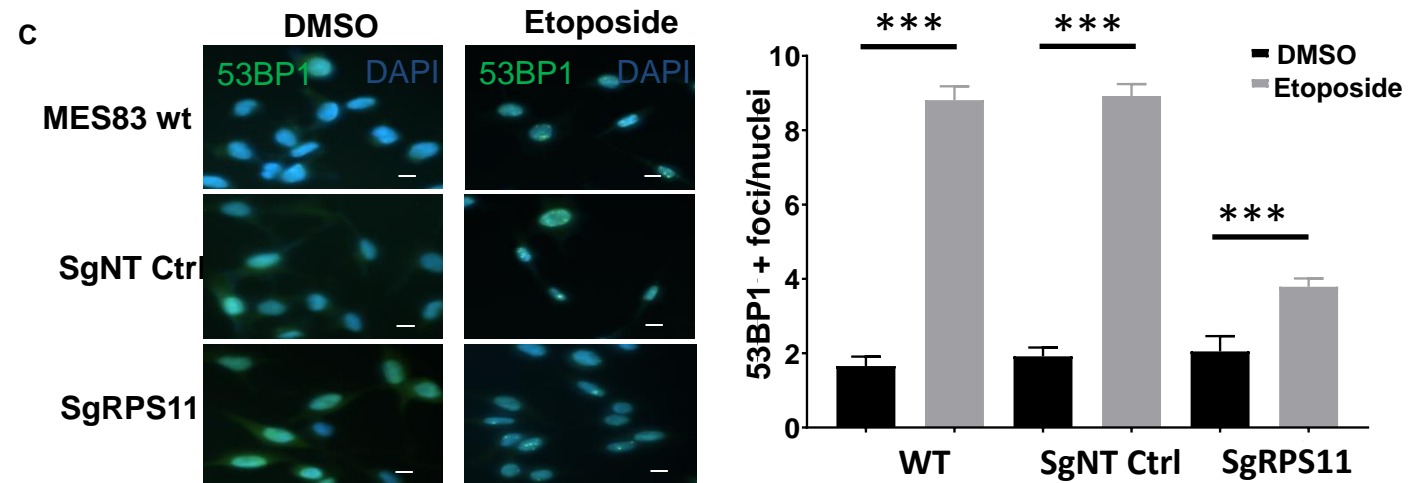

Supplement: NIHMS1599130-supplement-1599130_SuppFigures.pdf [file NIHMS1599130-supplement-1599130_SuppFigures.pdf]
